# Supplementary material for: Molecular framework integrating nitrate sensing in root and auxin-guided shoot adaptive responses
Source: PubMed Central journal article supplement — Proc Natl Acad Sci U S A. 2022 Jul 25;119(31):e2122460119. doi: 10.1073/pnas.2122460119 (PMC9351359; doi:10.1073/pnas.2122460119), 2022-07-25
Supplement: pnas.2122460119.sapp.pdf [file pnas.2122460119.sapp.pdf]

1 **Supplementary Information for**

2

3 **Molecular framework integrating nitrate sensing in root and**  
4 **auxin-guided shoot adaptive responses**

5

6 **Rashed Abualia<sup>1</sup>, Krisztina Ötvös<sup>1</sup>, Ondřej Novák<sup>2</sup>, Eleonore Bouguyon<sup>3</sup>, Kevin**  
7 **Domanegg<sup>1</sup>, Anne Krapp<sup>4</sup>, Philip Nacry<sup>3</sup>, Alain Gojon<sup>3</sup>, Benoit Lacombe<sup>3</sup>, Eva**  
8 **Benková<sup>1</sup>**

9 \*Correspondence: Eva Benková

10

11 **Email:** [eva.benkova@ist.ac.at](mailto:eva.benkova@ist.ac.at)

12

13 **This PDF file includes:**

14 Supplementary text

15 Figures S1 to S5

16 Tables S1 to S2

17 SI References

18 **Other supplementary materials for this manuscript include the following:**

19 None

20

21

22

23

24

25

26

27

28

29

30

## 31 **Supplementary Information text**

## 32 **Supplementary Material and Methods**

### 33 **Plant material**

34 All *A. thaliana* lines used in this study are in the Columbia ecotype. The mutant lines in this  
35 study are; *pin7-2*<sup>1</sup>, *pin4-3*<sup>2</sup>, *crf2-1*<sup>3</sup>, *crf2-2*<sup>3</sup>, *crf3-1*<sup>3</sup>, *crf6-1*<sup>3</sup>, *crf2,3,6*<sup>3</sup>, *RPS5a::CRF2*<sup>4</sup>,  
36 *35S::CRF6*<sup>3</sup>, *35S::CRF3*<sup>3</sup>, *nlp7-1*<sup>5</sup>, *nlp7-2*<sup>5</sup>, *ipt3,5,7*<sup>6</sup>, *abcg14*<sup>7</sup>, *ahk2ahk3*<sup>8</sup>. The following  
37 previously described GUS marker lines were used; *PIN1-GUS*<sup>1</sup>, *PIN3-GUS*<sup>9</sup>, *PIN4-GUS*<sup>10</sup>, *PIN6-*  
38 *GUS*<sup>1</sup>, *PIN7-GUS*<sup>1</sup>, *CRF2-GUS*<sup>3</sup>, *CRF3-GUS*<sup>11</sup>, *CRF6-GUS*<sup>11</sup>, and *NLP7-GUS*<sup>5</sup>, *ARR5-GUS*<sup>12</sup> all in  
39 Col0 background. The green fluorescent protein marker lines used in this work were  
40 previously described; *PIN1::PIN1-GFP*<sup>3</sup>,  $\Delta$ *PIN1::PIN1-GFP*<sup>3</sup> in Col0, their expression in *pin1-2*  
41 was obtained by crossing *PIN1::PIN1-GFP*<sup>3</sup>,  $\Delta$ *PIN1::PIN1-GFP*<sup>3</sup> with heterozygote *pin1-201*  
42 after crossing selection was based on the presence of GFP signal in seedlings, and are  
43 homozygote for T-DNA insertion of *pin1-201* using genotyping primers reported in the table  
44 below. *PIN7::PIN7-GFP*<sup>3</sup>,  $\Delta$ *PIN7::PIN7-GFP* in *pin7-2*<sup>3</sup>, *CRF2::CRF2-GFP*<sup>3</sup> in Col0, *NLP7::NLP7-*  
45 *GFP*<sup>5</sup>, *35S::GFP-NLP7*<sup>5</sup>.

### 46 **Growth conditions**

47 Seeds of *A. thaliana* were surface-sterilized with 70% ethanol and sown on a modified  
48 Murashige and Skoog (MS) medium; Boric Acid 6.2 mg/L, Calcium Chloride (anhydrous)  
49 332.2 mg/L, Cobalt Chloride (6H<sub>2</sub>O) 0.025 mg/L, Cupric Sulfate (5H<sub>2</sub>O) 0.025 mg/L, Na<sub>2</sub>EDTA  
50 (2H<sub>2</sub>O) 37.26 mg/L, Ferrous Sulfate (7H<sub>2</sub>O) 27.8 mg/L, Magnesium Sulfate (anhydrous)180.7  
51 mg/L, Molybdic Acid (disodium salt 2H<sub>2</sub>O) 0.25 mg/L, Potassium Iodide 0.83 mg/L,  
52 Potassium Phosphate (monobasic, anhydrous) 170 mg/L, Zinc Sulfate (7H<sub>2</sub>O) 8.6 mg/L;  
53 supplemented with 0.1% sucrose and 1% agar (Type E, Sigma A4675), pH=5,8. As a nitrogen  
54 source 0.5mM Ammonium Succinate (AS, Santa Cruz Biotechnology) (76 mg/L) or 5mM  
55 Potassium Nitrate KNO<sub>3</sub> (505 mg/L) was added. Seeds were stratified at least for 2 days and  
56 grown for 7-21 days at 21 °C in a 16 h light/8 h dark cycle.

57 Hormonal treatment such as application of cytokinin to roots only was performed as  
58 follows: The MS medium (see above) supplemented with 0.5mM Ammonium Succinate and  
59 cytokinin (100nM 6-Benzylaminopurine; BAP) was poured in square petri-dishes and after

60 solidification the upper ~2cm large band of medium was removed. 7-day-old seedlings were  
61 carefully placed on the medium so that only roots were in contact with the agar.

62

### 63 **Primary root growth**

64 7-day-old seedlings grown on 0.5mM AS containing medium were transferred on media  
65 supplemented with either 0.5mM AS, or 5mM KNO<sub>3</sub>. Seedlings were imaged using Epson  
66 Perfection V700 flatbed scanner daily for 4 consecutive days. The length of roots was  
67 measured manually using Fiji (V1.52) and root growth rate calculated as an increase in root  
68 length per day. Statistical evaluation was performed using Tukey's comparison test  
69 following a one-way ANOVA.

70

### 71 **Lateral root density and developmental stage analyses**

72 7-day-old seedlings grown on AS were transferred on media supplemented with either AS or  
73 KNO<sub>3</sub>. After 4 days seedlings were cleared according to the protocol as previously  
74 published<sup>13</sup>. Briefly, seedlings were incubated in 4% HCl, 20% methanol at 67°C for 5 min, in  
75 7% (w/v) NaOH, 60% ethanol at room temperature (RT) for 15 min, followed by incubation  
76 in a series of ethanol dilutions from 75% to 10% at RT. Seedlings were mounted on glass  
77 slides in drop of mounting medium (5%ethanol, 50%glycerol)<sup>13,14</sup>. The developmental stages  
78 of LRs and LRP in 8 seedlings per treatment were observed using Olympus BX53 microscope.  
79 The length of roots was measured manually using Fiji (V1.52) and LRP density calculated.  
80 Significant differences between LRP densities at each stage were determined using Tukey's  
81 multiple comparisons test following a one-way ANOVA.

82

### 83 **Cotyledons surface area analysis**

84 7-day-old seedlings grown on medium containing AS were either collected (D0), their shoots  
85 excised and mounted on slides in a drop of 25% glycerol, or transferred to AS or KNO<sub>3</sub>  
86 containing media for 24h and afterword shoots collected and processed as described for D0.  
87 The Leica EZ4HD stereomicroscope was used to obtain images of cotyledons and their  
88 surface area was measured manually using Fiji (v1.52). The growth of cotyledons was  
89 evaluated as the relative increase in surface area 24HAT on AS or KNO<sub>3</sub> containing media  
90 when compared to surface area of cotyledons at D0. 6-8 seedlings per treatment analyzed,

91 experiment repeated 2-3 times. Results from one representative experiment are presented.  
92 Significant differences were calculated by Tukey's Test following one-way ANOVA followed.

93

#### 94 **Pavement cell imaging and cell size measurements**

95 For observation of cotyledon pavement cells, the adaxial side of cotyledon surface was  
96 placed on melted 2% (w/v) low-melt agar containing 0.01% (w/v) bromophenol blue on a  
97 slide glass according to (Horiguchi *et al.*,2006)<sup>15</sup>. The cotyledon was peeled off when the  
98 agar began to dry. Completely dried agar was observed under Olympus BX53 microscope  
99 equipped with Olympus DP26 digital camera controlled by cellSense Entry software. The  
100 digital images of cotyledons surfaces were processed using CellSeT program to extract  
101 automated map of pavement cells <sup>16</sup>. The surface area of each cell in the map obtained by  
102 CellSeT program was measured automatically using the analyze particle function in Fiji  
103 (v1.52) program excluding the edges.

104

#### 105 **Shoot fresh weight measurement**

106 7-day-old seedlings grown on AS were transferred to KNO<sub>3</sub> containing medium and grown  
107 for 14 days vertically under the previously reported growth conditions. The experiments  
108 consisted of three biological replicates, each replicate containing 8 seedlings. On the 14<sup>th</sup>  
109 day the shoots were excised and weighed on VWR analytical balance (series no.IT1301517).  
110 Presented are average shoot fresh weight per a seedling. Significant differences were  
111 calculated by Tukey's Test following a one-way ANOVA.

112 For *pin1-201* phenotype analysis, a heterozygote T-DNA insertion line was used. A total of  
113 74 seedlings were genotyped of which 17 homozygote seedlings were identified. A  
114 representative image of *pin1-201* and Col0 seedlings grown on the same plates presented.

115 For shoot fresh weight (SI Apendix, Fig.S1. K, L) seedlings were grown (0.5×) Murashige and  
116 Skoog (MS) medium (Duchefa) with 1% (w/v) sucrose and 1% (w/v) agar (pH 5.9) for 21  
117 days, then handled as above.

118

#### 119 **GUS (β-Glucuronidase) staining**

120 *GUS* expression was analyzed in 7-day-old seedlings transferred for 6 hours on AS or KNO<sub>3</sub>  
121 supplemented media. Seedlings were incubated in staining buffer containing 1mM of Ferro-

122 Ferricyanide, 150mM sodium phosphate buffer (pH 7) and 1mg/ml of X-Gluc (dissolved in  
123 DMSO) at 37°C for 4-24 hours (time adjusted to the strength of GUS expression in individual  
124 lines). Seedlings were cleared as described above and mounted on slides in droplets of  
125 5%ethanol-50%glycerol mounting solution. The GUS histochemical staining was analyzed  
126 using Olympus BX53 microscope equipped with Olympus DP26 digital camera controlled by  
127 cellSense Entry software.

128

### 129 **RT-qPCR analysis**

130 Total RNA was extracted from excised 7-day-old seedling's roots and shoots 1 and 6 HAT to  
131 ammonium or nitrate containing plates using RNeasy® Plant Mini kit from (QIAGEN)  
132 according to the manufacturer's protocol. 1 and 0.5µg of RNA was used to synthesize cDNA  
133 (shoot and root respectively) using iScript™ cDNA synthesis kit (BIO Rad). The analysis was  
134 carried out on a LightCycler 480 II (SW1.5.1 Version; Roche Diagnostics) with the SYBR Green  
135 I Master kit (Roche Diagnostics) according to the manufacturer's instructions. All PCR  
136 reactions were carried out with three biological and technical triplicates. Expression levels of  
137 target genes were quantified by specific primers that were designed using Quant Prime<sup>17</sup>,  
138 and validated by performing primer efficiency for each primers pair. The levels of expression  
139 of each gene were first measured relative to *AT4G05320 (UBQ10)* and then to respective  
140 mock treatment (AS). Significant differences between expression level of a certain gene on  
141 nitrate and AS were calculated using two tailed t test. Full list of qPCR primers provided in  
142 the supplementary information section (SI Appendix, Supplementary Table 2).

143

### 144 **Grafting**

145 7-day-old seedlings were grafted according to the hypocotyl-grafting procedure by<sup>18</sup>. After  
146 a transverse cut at the hypocotyl, root and shoot parts were aligned within the silicon collar  
147 (Helix Medical, dimension 0.31mm diameter). Grafted seedlings were maintained for 48  
148 hours (for phenotype grafts) and 72 hours (for GUS staining grafts) on AS containing plates  
149 to heal, and then they were transferred to KNO<sub>3</sub> containing medium for either 14 days  
150 (extended Fig. 4A) or 24 hours (experiments Fig.4C, Fig 5A, SI Appendix Fig.S4E).

151 Grafted seedlings 24 hours after transfer on KNO<sub>3</sub> containing medium were subjected to  
152 GUS reporter expression analyses. Typically, scions of *PIN7::GUS* or *ARR5::GUS* reporter lines

153 were grafted on roots of either wild type or various mutant lines. At least 4 successful grafts  
154 per combination were analyzed for *GUS* expression. The experiments were repeated 2  
155 times.

156 In grafted seedlings grown for 14 days on  $\text{KNO}_3$ , adventitious roots were routinely removed  
157 and valid grafts determined on the basis of healthy primary root growth. Grafted seedlings  
158 were imaged using Epson Perfection V700 flatbed scanner. A total of 43 different grafts  
159 were performed, 33 were considered successful (evident by restoration of root growth). The  
160 reported phenotype was visible in 70% of the successful grafts.

161

### 162 **Imaging and image analysis of PIN-GFP expression**

163 7-day-old seedlings were transferred on the AS or  $\text{KNO}_3$  containing media for 3 hours,  
164 afterward mounted on slides in a droplet of water and imaged with Zeiss, LSM800 vertical  
165 confocal microscopes equipped with a 20 $\times$ /0.8 Plan-Apochromat M27 objective.  
166 Fluorescence signals for GFP (excitation 488 nm, emission 507 nm) and Chlorophyll A signal  
167 for auto-fluorescence (excitation 640nm, emission 645-700 nm ) to verify the authenticity of  
168 membrane bound-signal were detected. Maximum intensity Z-stack projections of confocal  
169 images of at least 4 cotyledons from 4 different seedlings per treatment were used. To  
170 monitor *PIN7::PIN7-GFP* expression pattern cotyledons in their middle part were imaged.  
171 The membrane PIN-GFP signal of two epidermal cells at adaxial side per cotyledon was  
172 measured using the segmented line function to mark the cell membrane to obtain a  
173 quantification of mean grey value using Fiji (v152). Significant differences were calculated  
174 by Tukey's Test following one-way ANOVA. Experiments were conducted 2-3 times,  
175 representative images and quantification from one experiment are shown.

176 For monitoring *PIN1::PIN1-GFP*, clearing method using Clearsee<sup>®</sup> solution was utilized to  
177 diminish chlorophyll autofluorescence and to enhance deep imaging and optical sectioning  
178 of the major vasculature extending between the petiole and the first vasculature branching  
179 junction in the cotyledon. Clearing process was performed according to the manufacturer  
180 protocols<sup>19</sup>. Maximum intensity Z-stack projection images of at least 4 different cotyledons  
181 of 4 different seedlings per treatment were obtained. Plasma membrane of cells within  
182 vasculature were marked using the segmented line function in Fiji (v152) and a mean grey  
183 value as a quantification of PIN1-GFP intensity obtained. Experiments were repeated 2-3

184 times; representative images and quantification from one repetition are shown. Significant  
185 differences were calculated by Tukey's Test following one-way ANOVA.

186

### 187 **Measurements of endogenous cytokinins**

188 Quantification of cytokinin metabolites were performed according to the method described  
189 by <sup>20</sup> including modifications described by <sup>21</sup>. Samples (20 mg FW) were homogenized and  
190 extracted in 1 ml of modified Bielecki buffer (60% MeOH, 10% HCOOH and 30% H<sub>2</sub>O)  
191 together with a cocktail of stable isotope-labeled internal standards (0.25 pmol of CK bases,  
192 ribosides, *N*-glucosides, and 0.5 pmol of CK *O*-glucosides, nucleotides per sample added).  
193 The extracts were applied onto an Oasis MCX column (30 mg/1 ml, Waters) conditioned  
194 with 1 ml each of 100% MeOH and H<sub>2</sub>O, equilibrated sequentially with 1ml of 50% (v/v)  
195 nitric acid, 1 ml of H<sub>2</sub>O, and 1 ml of 1M HCOOH, and washed with 1 ml of 1M HCOOH and 1  
196 ml 100% MeOH. Analytes were then eluted by two-step elution using 1 ml of 0.35M NH<sub>4</sub>OH  
197 aqueous solution and 2 ml of 0.35M NH<sub>4</sub>OH in 60% (v/v) MeOH solution. The eluates were  
198 then evaporated to dryness *in vacuo* and stored at -20°C. Cytokinin levels were determined  
199 by an ultra-high performance liquid chromatography-electrospray tandem mass  
200 spectrometry (UHPLC-MS/MS) using stable isotope-labelled internal standards as a  
201 reference (Rittenberg and Foster, 1940). Separation was performed on an Acquity UPLC®  
202 System (Waters, Milford, MA, USA) equipped with an Acquity UPLC BEH Shield RP18 column  
203 (150x2.1 mm, 1.7 µm; Waters), and the effluent was introduced into the electrospray ion  
204 source of a triple quadrupole mass spectrometer Xevo™ TQ-S MS (Waters). Five  
205 independent biological replicates were performed.

206

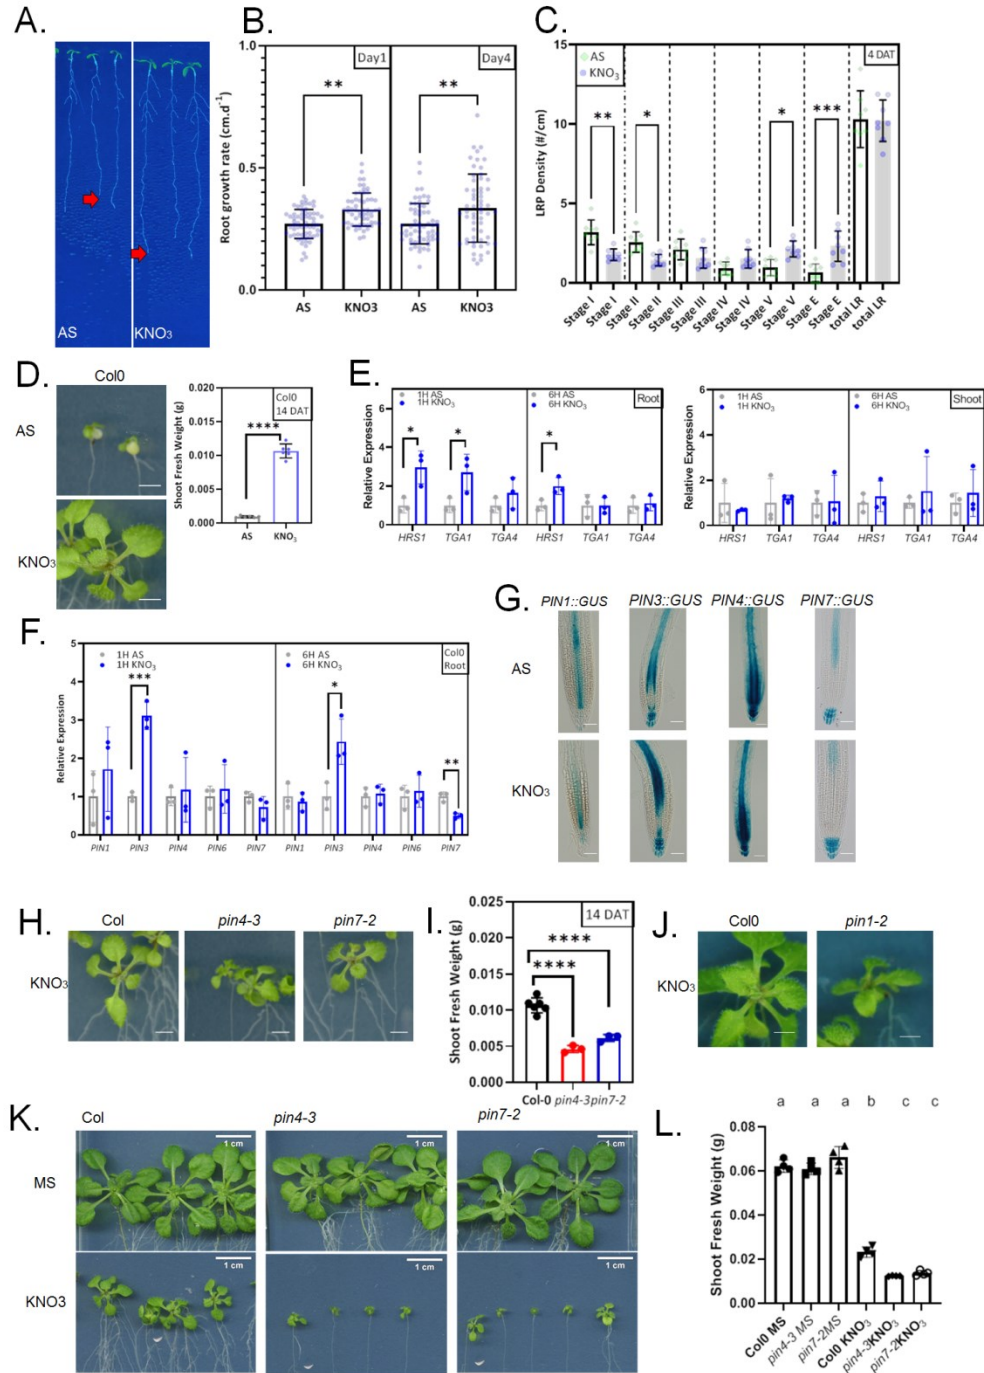

207 None

208 **Fig. S1. Modulation of PIN expression is part of nitrate-mediated transcriptional reprogramming**

209 (A) Wild-type (Col0) seedlings grown for 7 days on AS and transferred for 4 days to either AS or KNO<sub>3</sub>  
 210 containing media; red arrows indicate primary root tips. (B, C) Root growth rate (B) and lateral root primordia  
 211 (LRP) density (C) quantified after transfer of 7-day-old seedlings for one (B) and four (B,C) days on AS or KNO<sub>3</sub>.  
 212 Significant differences determined by one-way ANOVA followed by Tukey's multiple comparison test,  
 213 \*\*P<0.01, n=60 seedlings (B) \* P<0.05, \*\*P<0.01, \*\*\*P<0.001 (C) n= 8 seedlings/treatment. (D) Representative  
 214 images of shoots of wild type (Col0) seedlings 14 DAT to AS and KNO<sub>3</sub> and quantification of shoot fresh weight.



215 Significant differences determined by Student's t test, \*\*\*\* $p < 0.0001$  (n= 3 biological replicates, 8 shoots per  
216 biological replicate) **(E,F)** RT-qPCR analysis of early nitrate responsive genes in Col0 roots and shoots (E) and  
217 *PIN* genes in Col0 roots (F) normalized to *UBQ10* (*AT4G05320*) levels 1 and 6 HAT to AS or  $KNO_3$  containing  
218 medium. All RT-qPCR reactions were carried out with biological and technical triplicates. Statistical difference  
219 determined by Student's t-test \*  $P < 0.05$ , \*\* $P < 0.01$  \*\*\* $P < 0.001$ . **(G)** Expression analyses of *PIN::GUS* reporters  
220 in roots of 7-day-old seedlings 6 HAT to AS and  $KNO_3$ . **(H-J)** Representative images of shoots of Col0, *pin4-3*,  
221 and *pin7-2* seedlings (H), and Col0 and *pin1-2* (J) 14 DAT on AS and  $KNO_3$  containing media (H,J) and  
222 quantification of shoot fresh weight (I). Significant differences determined by one-way ANOVA followed by  
223 Tukey's multiple comparison test, \*\*\*\* $p < 0.0001$ , (n=3 biological replicates, 8 shoots per biological replicate)  
224 (I). Scale bars 4 mm (D,H,J), 50  $\mu m$ (G) . **(K,L)** Representative images (K) and fresh weight quantification (L) of  
225 shoots of Col0, *pin4-3*, and *pin7-2* seedlings grown either continuously for 21 days on MS media (upper panel)  
226 or after 7 days on AS transferred for 14 days on  $KNO_3$  containing media (lower panel). Significant differences  
227 determined by one-way ANOVA followed by Tukey's multiple comparison test, different lower case letter  
228 indicate (\* $p < 0.05$ ), (n=4 biological replicates, 8 shoots per biological replicate), Scale bars 1 cm (K).

229

230

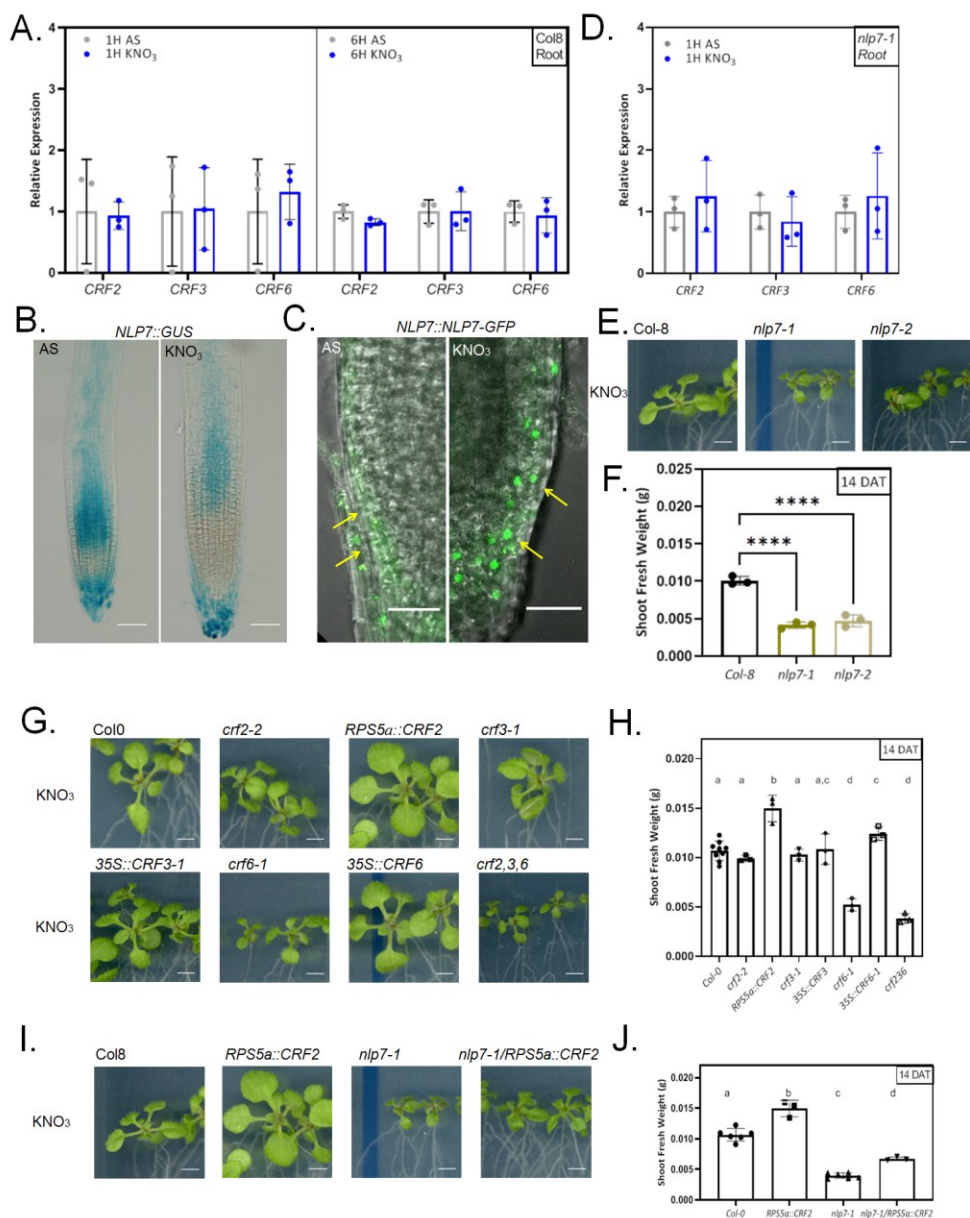

231

232 **Fig. S2. Cytokinin response factors mediate shoot developmental adaptations to nitrate**

233 (A,D) RT-qPCR expression analysis of *CRF* genes normalized to *UBQ10* (*AT4G05320*) 1 and 6 HAT on AS or  $\text{KNO}_3$   
 234 containing media in Col8 (A) and *nlp7-1* (D) roots. All RT-qPCR reactions were carried out with biological and  
 235 technical triplicates. Statistical difference determined with Student's t-test \* $P < 0.05$ , \*\* $P < 0.01$ . (B,C) Expression  
 236 analyses of *NLP7::GUS* reporter in roots of 7-day-old seedlings 6 HAT to AS or  $\text{KNO}_3$  containing media (B) and of  
 237 *NLP7::NLP7-GFP* 30 minutes after transfer to AS or  $\text{KNO}_3$  (C). Yellow arrows indicate the nuclear localization of  
 238 NLP7 on  $\text{KNO}_3$ . (E,F) Representative images of shoots from 7-day-old wild type (Col8) and *nlp7* seedlings 14

239 DAT on AS or KNO<sub>3</sub> containing media (E) and quantification of shoot fresh weight (F). Significant differences  
240 determined by one-way ANOVA followed by Tukey's multiple comparison test, \*\*\*p<0.0001 (n= 3 biological  
241 replicates, 8 shoots per biological replicate). **(G-J)** Representative images of shoots from 7-day-old wild type  
242 (Col0) and transgenic lines 14 DAT on AS and KNO<sub>3</sub> (G,I) and quantification of shoot fresh weight (H,J).  
243 Significant differences determined by one-way ANOVA followed by Tukey's multiple comparison test, different  
244 lower case letter indicate (P<0.05) (n= 3 biological replicates, 8 seedlings per biological replicate). Scale bars 50  
245 μm (B), 24 μm (C), 4 mm (E,G,I).

246

247

248

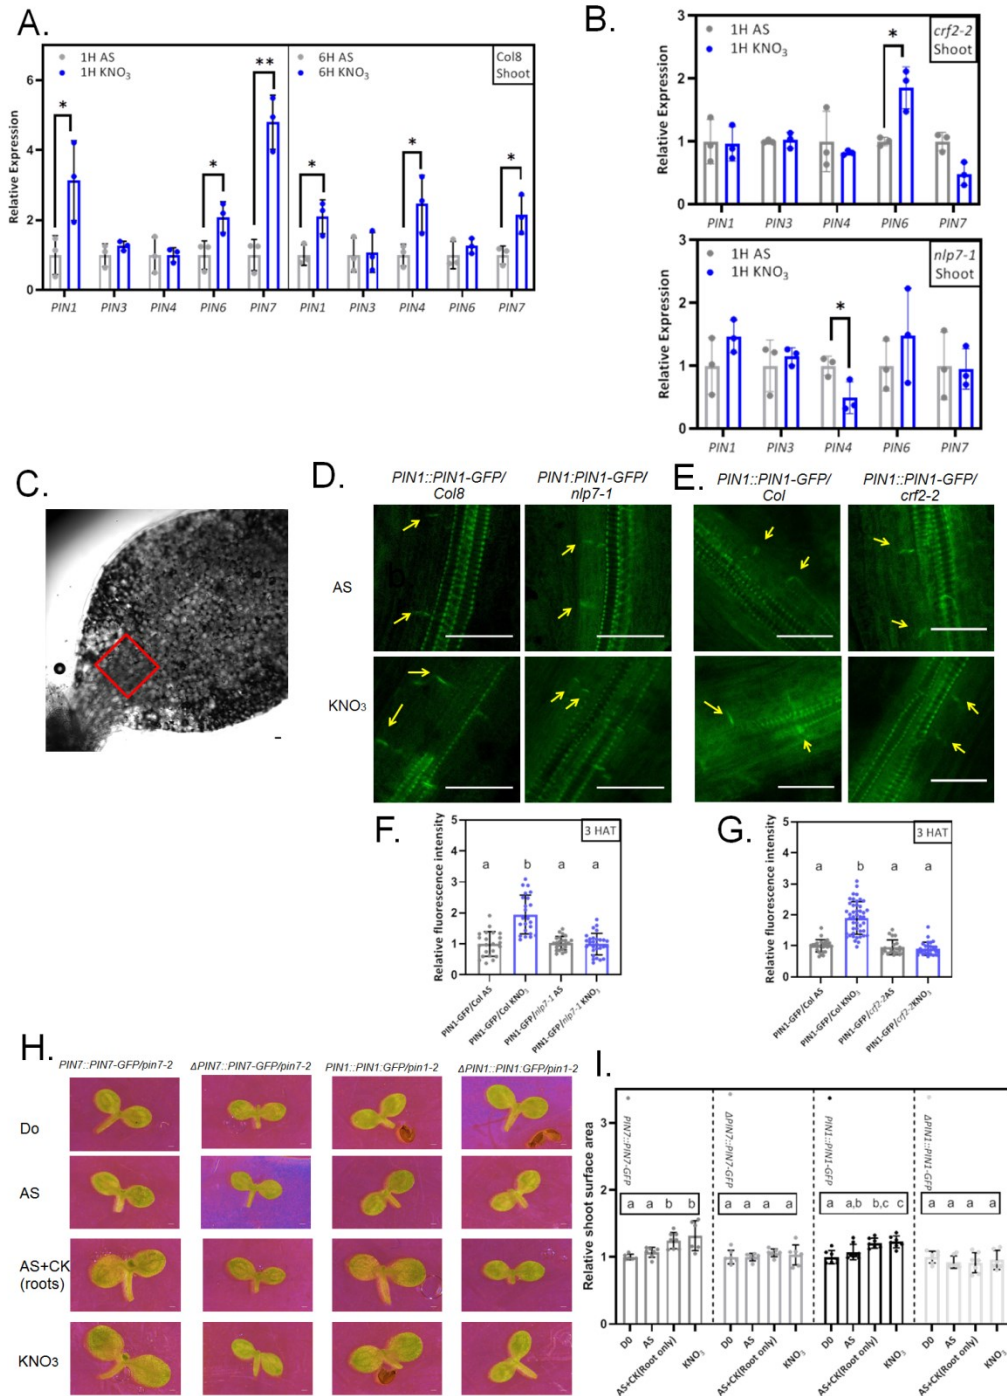

249

250

251 **Fig. S3. NLP7 fine-tunes expression of PINs and shoot developmental adaptation to nitrate through CRFs**

252 **(A,B)** RT-qPCR analysis of *PIN* genes normalized to *UBQ10* (*AT4G05320*) levels 1 HAT to AS or  $\text{KNO}_3$  containing  
 253 medium in Col8 shoots (A) *nlp7-1* and in *crf2-2* shoots (B). All RT-qPCR reactions were carried out with  
 254 biological and technical triplicates. Statistical difference determined with a Student's t-test \*  $P < 0.05$ . (C-J)  
 255 Representative image of a cotyledon, red square indicate imaging area(C). Monitoring (D,E) and quantification

256 (F,J) of PIN1-GFP membrane signal in vasculature (yellow arrows) of cotyledons 3HAT to AS or KNO<sub>3</sub>  
257 supplemented media in *nlp7-1* (D,F) and *crf2-2* (E,G). Different lower-case letters indicate one-way ANOVA  
258 followed by a Tukey's multiple comparison test (P< 0.05). n= at least 2 cells of vasculature in at least 4 different  
259 seedlings per treatment measured. **(H,I)** Imaging (G) and surface area quantification (H) of cotyledons from 7-  
260 day-old *PIN7::PIN7-GFP,pin7-2*, *ΔPIN7::PIN7-GFP,pin7-2*, *PIN1::PIN1-GFP,pin1-2* and *ΔPIN1::PIN1-GFP,pin1-2*  
261 seedlings grown on AS (D0), and 24 HAT to either AS, AS supplemented with 100nM cytokinin (CK, 6-  
262 Benzylaminopurine) or KNO<sub>3</sub> containing media. Relative size quantified as cotyledon mean surface area on AS  
263 or AS plus CK or KNO<sub>3</sub> 24 HAT compared to D0 (n=6-8 seedlings per treatment). Experiment repeated twice;  
264 results from one representative experiment are presented. Different lower-case letters indicate the significant  
265 One-way ANOVA followed by Tukey's multiple comparison test (at least P< 0.05) **(H)**. Scale bars 12 μm (D,E),  
266 100 μm (H).

267

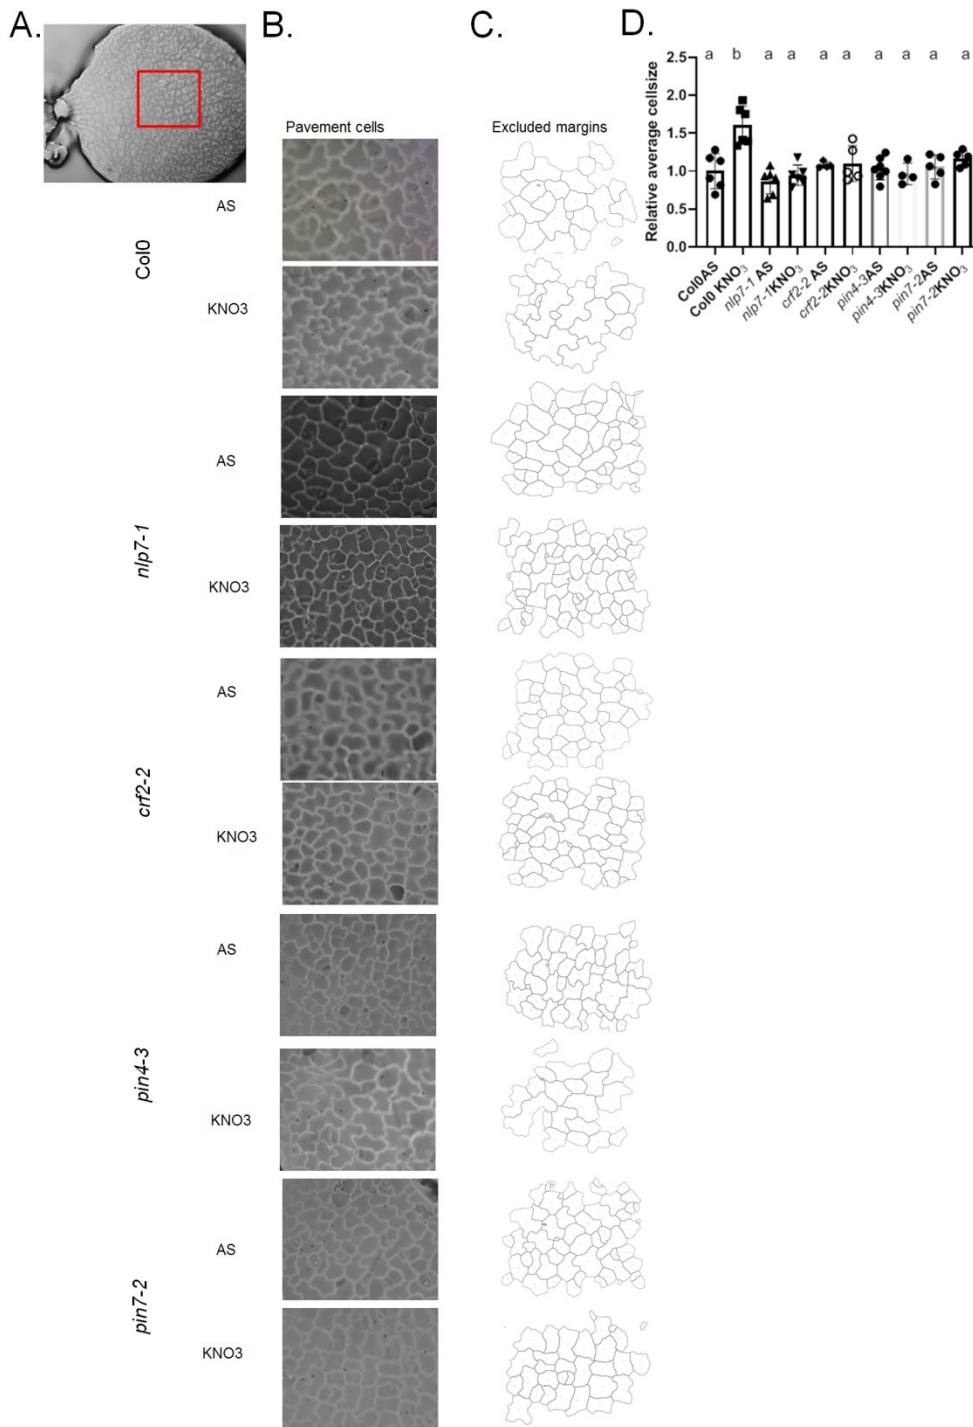

269

270 **Fig. S4. Pavement cell size growth 24HAT to AS and KNO<sub>3</sub> containing media**

271 (A-C) Pavement cells at the adaxial side in the middle part of cotyledons (A, red square) were visualized <sup>15</sup>(B),  
 272 automated map of pavement cell extracted using CellSeT program <sup>16</sup>(C) and average cell size was quantified  
 273 (D). Seedlings of wild-type, *nlp7*, *crf2-2*, *pin4-3* and *pin7-2* mutants were grown for 7 days on media  
 274 supplemented with AS and transferred to either AS or nitrate containing medium for 24 hours. The relative cell  
 275 size when compared to Col0 on AS calculated (n=4-7 seedlings, 2 biological repeats). Different lower-case

276 letters indicate the significant One-way ANOVA followed by Tukey's multiple comparison test (at least \*P<  
277 0.05)

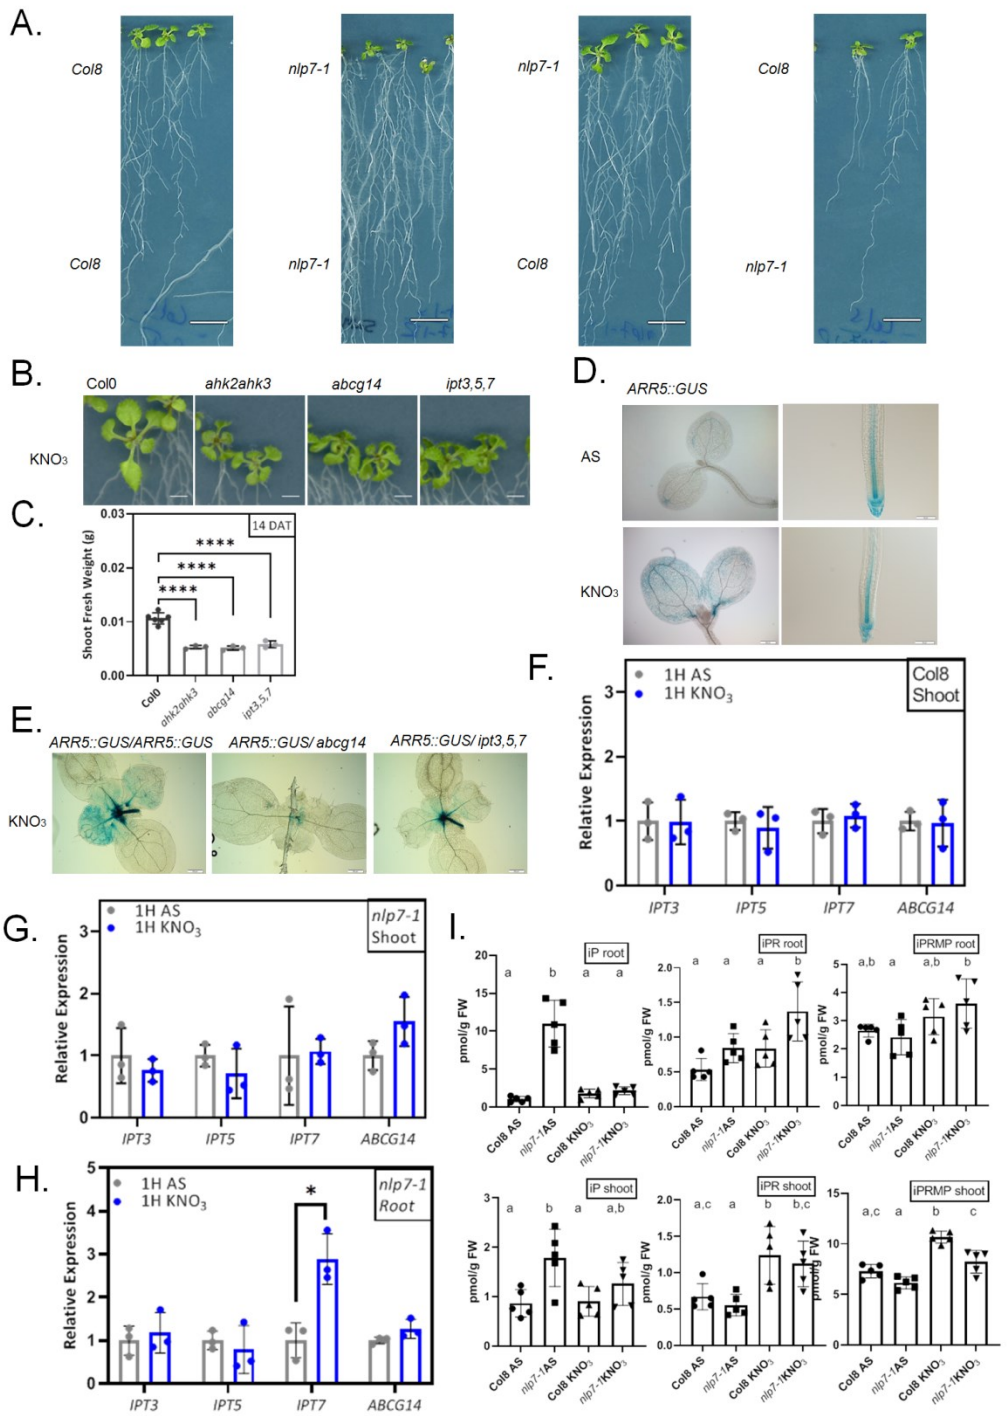

278

279

280

281 **Fig. S5. NLP7-mediated signaling in roots controls cytokinin levels in shoots**

282 **(A)** Representative images of grafted seedlings and shoots (close-ups) of Col8R(root)/Col8S(shoot), *nlp7-*  
 283 *1R/nlp7-1S*, Col8R/*nlp7-1S* and *nlp7-1R*/Col8S 14DAT to KNO<sub>3</sub> containing medium. **(B,C)** Representative images  
 284 of shoots of 7-day-old wild type Col0, *ahk2ahk3*, *abcg14*, and *ipt3,5,7* seedlings 14 DAT to KNO<sub>3</sub> (B) and shoot  
 285 fresh weight quantification (C). Significant differences determined by one-way ANOVA followed by Tukey's



286 multiple comparison test, \*\*\*\* $p < 0.0001$  (n= 3 biological replicates, 8 shoots per biological replicate). **(D)**  
287 Expression analyses of *ARR5::GUS* in shoots of 7-day-old seedlings 6 HAT to AS or  $\text{KNO}_3$  containing media. **(E)**  
288 Representative images of *ARR5::GUS* expression in the shoots grafted on roots of *ARR5::GUS*, *abcg14* or  
289 *ipt3,5,7*, respectively. Grafted seedlings after 72 hours of healing on AS medium, then transferred to  $\text{KNO}_3$  for  
290 24 hours. **(F-H)** RT-qPCR analysis of *IPTs* and *ABCG14* expression normalized to *UBQ10 (AT4G05320)* in Col8  
291 shoots (F) and *nlp7-1* shoots (G) and roots (H) 1 HAT to AS or  $\text{KNO}_3$  containing media. All RT-qPCR reactions  
292 were carried out with biological and technical triplicates. Statistical difference was calculated with a t-test  
293 \* $P < 0.05$ . **(I)**. Quantification of *isopentenyladenine (iP)*, *isopentenyladenine riboside (iPR)* *isopentenyladenine*  
294 *riboside 5'-monophosphate (iPRMP)* in roots and shoots of Col8 and *nlp7-1* seedlings 6 HAT on AS and  $\text{KNO}_3$   
295 containing media. Different lower-case letters indicate one-way ANOVA followed by Tukey's multiple  
296 comparison test ( $P < 0.05$ ) (n= 5 biological replica/genotype/treatment). Scale bars 4mm (B), 200  $\mu\text{m}$  shoots,  
297 50  $\mu\text{m}$  roots (D), 200 $\mu\text{m}$  (E).

298

299

300

| Tissue | Line | Treatment | Total IZtypes  | IP7G           | IP9G           | IZRMP          | IZOG           | IZROG         | IZ7G            | IZ9G          |  |
|--------|------|-----------|----------------|----------------|----------------|----------------|----------------|---------------|-----------------|---------------|--|
| AS     | Col8 | Root      | 34.39 ± 2.04   | 26.45 ± 1.51   | 3.72 ± 0.15    | <LOD           | 9.19 ± 2.23    | 0.08 ± 0.02   | 7.63 ± 0.58     | 10.46 ± 2.45  |  |
|        |      |           | 40.39 ± 4.55 * | 22.81 ± 2.57 * | 3.33 ± 0.40    | <LOD           | 6.88 ± 0.84    | 0.11 ± 0.02   | 4.90 ± 0.72 *** | 7.34 ± 1.08 * |  |
|        |      |           | 34.77 ± 3.77   | 25.30 ± 2.55   | 3.69 ± 0.40    | 8.74 ± 1.58    | 0.14 ± 0.04    | 7.07 ± 0.77   | 8.99 ± 1.56     |               |  |
| KNO3   | Col8 | Root      | 37.85 ± 1.26   | 26.83 ± 0.48   | 3.88 ± 0.26    | <LOD           | 9.56 ± 0.98    | 0.18 ± 0.03   | 6.57 ± 0.10     | 8.56 ± 0.42   |  |
|        |      |           | 85.30 ± 2.29   | 65.83 ± 3.09   | 10.63 ± 0.58   | 4.12 ± 0.94    | 10.35 ± 1.57   | 0.74 ± 0.19   | 17.43 ± 0.88    | 12.58 ± 1.80  |  |
|        |      |           | 84.62 ± 3.02   | 64.94 ± 3.56   | 11.19 ± 0.83   | 4.59 ± 4.60    | 3.34 ± 1.16    | 0.68 ± 0.12   | 15.54 ± 0.26 ** | 13.00 ± 2.03  |  |
| AS     | Col8 | Shoot     | 82.81 ± 5.15   | 68.52 ± 4.70   | 11.47 ± 0.54   | 52.80 ± 3.11   | 6.35 ± 1.82    | 0.87 ± 0.16   | 18.06 ± 0.69    | 12.48 ± 0.57  |  |
|        |      |           | 87.91 ± 5.06   | 66.60 ± 3.96   | 10.71 ± 0.23 * | 48.12 ± 1.49 * | 4.37 ± 0.89    | 0.71 ± 0.13   | 15.85 ± 0.95 ** | 12.27 ± 0.31  |  |
|        |      |           |                |                |                |                |                |               |                 |               |  |
| KNO3   | Col8 | Shoot     | 45.04 ± 5.61   | 4.12 ± 0.94    | 10.35 ± 1.57   | 45.04 ± 5.61   | 4.12 ± 0.94    | 10.35 ± 1.57  | 17.43 ± 0.88    | 12.58 ± 1.80  |  |
|        |      |           | 45.59 ± 4.60   | 3.34 ± 1.16    | 12.03 ± 1.45   | 45.59 ± 4.60   | 3.34 ± 1.16    | 0.68 ± 0.12   | 15.54 ± 0.26 ** | 13.00 ± 2.03  |  |
|        |      |           | 52.80 ± 3.11   | 6.35 ± 1.82    | 0.87 ± 0.16    | 52.80 ± 3.11   | 6.35 ± 1.82    | 0.87 ± 0.16   | 18.06 ± 0.69    | 12.48 ± 0.57  |  |
| KNO3   | Col8 | Shoot     | 48.12 ± 1.49 * | 4.37 ± 0.89    | 12.95 ± 1.03   | 48.12 ± 1.49 * | 4.37 ± 0.89    | 0.71 ± 0.13   | 15.85 ± 0.95 ** | 12.27 ± 0.31  |  |
|        |      |           |                |                |                |                |                |               |                 |               |  |
|        |      |           |                |                |                |                |                |               |                 |               |  |
| AS     | Col8 | Root      | Total CZtypes  | CZ             | CZR            | CZRMP          | CZROG          | CZ7G          | CZ9G            |               |  |
|        |      |           | 128.54 ± 6.87  | 0.71 ± 0.05    | 2.05 ± 0.21    | 18.92 ± 4.71   | 2.25 ± 0.17    | 98.23 ± 1.43  | 6.38 ± 1.72     |               |  |
|        |      |           | 113.94 ± 15.56 | 0.68 ± 0.04    | 2.67 ± 0.37 *  | 14.60 ± 4.38   | 2.74 ± 0.37 *  | 88.32 ± 13.46 | 4.92 ± 0.69     |               |  |
| KNO3   | Col8 | Root      | 129.51 ± 8.48  | 0.88 ± 0.15    | 2.43 ± 0.38    | 19.07 ± 2.61   | 2.58 ± 0.56    | 98.44 ± 8.12  | 6.13 ± 1.09     |               |  |
|        |      |           | 130.95 ± 6.19  | 0.93 ± 0.07    | 3.42 ± 0.63 *  | 16.08 ± 1.59   | 2.78 ± 0.42    | 100.88 ± 8.31 | 6.88 ± 0.94     |               |  |
|        |      |           | 161.77 ± 6.56  | 0.36 ± 0.04    | 2.45 ± 0.34    | 15.74 ± 3.52   | 7.17 ± 1.22    | 130.43 ± 7.36 | 5.62 ± 1.13     |               |  |
| AS     | Col8 | Shoot     | 164.38 ± 3.38  | 0.39 ± 0.03    | 2.25 ± 0.15    | 16.66 ± 2.95   | 5.69 ± 0.68    | 133.01 ± 2.75 | 6.38 ± 1.10     |               |  |
|        |      |           | 174.37 ± 11.38 | 0.36 ± 0.03    | 2.91 ± 0.23    | 23.10 ± 4.35   | 7.33 ± 0.54    | 134.11 ± 9.36 | 6.56 ± 0.15     |               |  |
|        |      |           | 165.38 ± 9.36  | 0.37 ± 0.02    | 2.37 ± 0.24 *  | 18.32 ± 4.21   | 5.74 ± 0.46 ** | 131.59 ± 7.61 | 6.98 ± 0.38     |               |  |
| KNO3   | Col8 | Shoot     | 165.38 ± 9.36  | 0.37 ± 0.02    | 2.37 ± 0.24 *  | 18.32 ± 4.21   | 5.74 ± 0.46 ** | 131.59 ± 7.61 | 6.98 ± 0.38     |               |  |
|        |      |           |                |                |                |                |                |               |                 |               |  |
|        |      |           |                |                |                |                |                |               |                 |               |  |

301

302 **Supplementary Table 1. Cytokinin content in wild type (Col8) and *nlp7-1* shoots and roots**

303 Quantification of cytokinins in roots and shoots of Col8 and *nlp7-1* seedlings 6 HAT to AS or KNO<sub>3</sub> containing  
304 media, mean value and standard deviation from 5 biological replicas, significant difference calculated unpaired  
305 t test, \*P<0.05.

306 Abbreviations:

307 *iP7G, isopentenyladenine 7-glucoside, iP9G; isopentenyladenine 9-glucoside*  
308 *tZRMP; tZ riboside 5'-monophosphate, tZOG; transzeatin O-glucoside, tZROG; trans-zeatin-O-glucoside*  
309 *riboside, tZ7G; trans-zeatin N7-glucoside, tZ9G; trans-zeatin N9-glucoside*  
310 *cZ ;cis-zeatin, cZR; cis-zeatin riboside, cZRMP ; cis-zeatin riboside-5' –monophosphate, cZROG; cis-zeatin-O-*  
311 *glucoside riboside, cZ9G; cis-zeatin N9-glucoside, cZ7G; cis-zeatin N7-glucoside.*

312

313

314

315

316

317

318

319

320

321

322

323

324

325

326

327

328

329

330

331

332

333

334

335

336

337

| <u>Primer Name</u> | <u>Sequence</u>           | <u>Purpose</u> |
|--------------------|---------------------------|----------------|
| <u>PIN1 F</u>      | GGCATGGCTATGTTTCAGTCTTG   | <u>qRT-PCR</u> |
| <u>PIN1 R</u>      | ACGGCAGGTCCAACGACAAATC    | <u>qRT-PCR</u> |
| <u>PIN3 F</u>      | AAGGCGGAAGATCTGACCAAGG    | <u>qRT-PCR</u> |
| <u>PIN3 R</u>      | TGCTGGATGAGCTACAGCTTTG    | <u>qRT-PCR</u> |
| <u>PIN4 F</u>      | ACAACGTGGCAACGGAACAATC    | <u>qRT-PCR</u> |
| <u>PIN4 R</u>      | GCCGATATCATCACCACCACTC    | <u>qRT-PCR</u> |
| <u>PIN6 F</u>      | TTCATGGCTGGTGCTTCCCTTC    | <u>qRT-PCR</u> |
| <u>PIN6 R</u>      | GCCTGTACGATAGCAGCATGTAAC  | <u>qRT-PCR</u> |
| <u>PIN7 F</u>      | ATTGCGTGTGGCCATTGTTCAAGC  | <u>qRT-PCR</u> |
| <u>PIN7 R</u>      | GCAAACACAAACGGCACGATCC    | <u>qRT-PCR</u> |
| <u>NLP7 F</u>      | TCTCCGGTGTTCCTTCTTTCCG    | <u>qRT-PCR</u> |
| <u>NLP7 R</u>      | CAGCTGCTGATGGAGAAGAGTAAG  | <u>qRT-PCR</u> |
| <u>UBQ 10 R</u>    | CACACTCCACTTGGTCTTGC      | <u>qRT-PCR</u> |
| <u>UBQ10 F</u>     | TGGTCTTCCGGTGAGAGTCTTCA   | <u>qRT-PCR</u> |
| <u>CRF2 F</u>      | GAAGAGCCATCCATGACAACGG    | <u>qRT-PCR</u> |
| <u>CRF2 R</u>      | AGAACAAGGGCGCCGAGAAATC    | <u>qRT-PCR</u> |
| <u>CRF3 F</u>      | ACAACGTCGTCACCGGAGTTTC    | <u>qRT-PCR</u> |
| <u>CRF3 R</u>      | ACGCCGGAGATTGAGTTTCATCG   | <u>qRT-PCR</u> |
| <u>CRF6 F</u>      | TCAAAGGACCTAAAGCGCTCACG   | <u>qRT-PCR</u> |
| <u>CRF6 R</u>      | TGGAGATCGATAACCGGCGTTG    | <u>qRT-PCR</u> |
| <u>TGA1 F</u>      | GACCCTCCGATCTTCTCAAGGTTTC | <u>qRT-PCR</u> |
| <u>TGA1 R</u>      | TCAACGCGTCTTCTGCTTGCTG    | <u>qRT-PCR</u> |
| <u>TGA4 F</u>      | AAAGTCGTTTGC GCAAGAAAGC   | <u>qRT-PCR</u> |
| <u>TGA4 R</u>      | AGCATTGGTATCTACTCCGTTCCC  | <u>qRT-PCR</u> |
| <u>HRS1 F</u>      | TGGTGTGCCTCAAGTAACTGCTG   | <u>qRT-PCR</u> |
| <u>HRS1 R</u>      | TCCAATTCGCTTGAAGAAGGTGAC  | <u>qRT-PCR</u> |
| <u>IPT3 F</u>      | TGGTCTATTCAGAGAGTGGATGCG  | <u>qRT-PCR</u> |
| <u>IPT3 R</u>      | AGCATCCATCTTGGACCTTCGC    | <u>qRT-PCR</u> |
| <u>IPT5 F</u>      | TGTCGTGCGGAATAGTGTACGG    | <u>qRT-PCR</u> |
| <u>IPT5 R</u>      | AACCGCGTTGACCAACGATCTC    | <u>qRT-PCR</u> |
| <u>IPT7 F</u>      | TGTTGACGCCACTGAGGTGTTTC   | <u>qRT-PCR</u> |
| <u>IPT7 R</u>      | TCTCCAAGCCTCGTCTTGTTTC    | <u>qRT-PCR</u> |
| <u>ABCG14 F</u>    | TCTACTATGGCGCTGCCTCTTC    | <u>qRT-PCR</u> |
| <u>ABCG14 R</u>    | TCTGAGTATCAGGTGGGATTCCG   | <u>qRT-PCR</u> |

338

339 **Supplementary Table 2. Primers used in RT-qPCR**

340

341

342

343

344

345

346

347 **References**

- 348 1. Benková, E. *et al.* Local, Efflux-Dependent Auxin Gradients as a Common Module for  
349 Plant Organ Formation. *Cell* **115**, 591–602 (2003).
- 350 2. *Arabidopsis protocols*. (Humana Press, 2014).
- 351 3. Šimášková, M. *et al.* Cytokinin response factors regulate PIN-FORMED auxin  
352 transporters. *Nature Communications* **6**, 8717 (2015).
- 353 4. Inzé, A. *et al.* A subcellular localization compendium of hydrogen peroxide-induced  
354 proteins: Hydrogen peroxide-induced protein compendium. *Plant, Cell & Environment*  
355 **35**, 308–320 (2012).
- 356 5. Castaings, L. *et al.* The nodule inception-like protein 7 modulates nitrate sensing and  
357 metabolism in Arabidopsis. *The Plant Journal* **57**, 426–435 (2009).
- 358 6. Miyawaki, K. *et al.* Roles of Arabidopsis ATP/ADP isopentenyltransferases and tRNA  
359 isopentenyltransferases in cytokinin biosynthesis. *Proceedings of the National Academy*  
360 *of Sciences* **103**, 16598–16603 (2006).
- 361 7. Le Hir, R. *et al.* ABCG9, ABCG11 and ABCG14 ABC transporters are required for vascular  
362 development in Arabidopsis. *Plant J* **76**, 811–824 (2013).
- 363 8. Higuchi, M. *et al.* In planta functions of the Arabidopsis cytokinin receptor family.  
364 *Proceedings of the National Academy of Sciences* **101**, 8821–8826 (2004).
- 365 9. Friml, J., Wiśniewska, J., Benková, E., Mendgen, K. & Palme, K. Lateral relocation of auxin  
366 efflux regulator PIN3 mediates tropism in *Arabidopsis*. *Nature* **415**, 806–809 (2002).
- 367 10. Friml, J. *et al.* AtPIN4 Mediates Sink-Driven Auxin Gradients and Root Patterning in  
368 Arabidopsis. *Cell* **108**, 661–673 (2002).

- 369 11. Jeon, J. *et al.* A Subset of Cytokinin Two-component Signaling System Plays a Role in  
370 Cold Temperature Stress Response in Arabidopsis. *Journal of Biological Chemistry* **285**,  
371 23371–23386 (2010).
- 372 12. D’Agostino, I. B., Deruère, J. & Kieber, J. J. Characterization of the Response of the  
373 Arabidopsis Response Regulator Gene Family to Cytokinin. *Plant Physiol.* **124**, 1706–  
374 1717 (2000).
- 375 13. Malamy, J. E. & Benfey, P. N. Organization and cell differentiation in lateral roots of  
376 Arabidopsis thaliana. *Development* **124**, 33–44 (1997).
- 377 14. Dubrovsky, J. G., Gambetta, G. A., Hernández-Barrera, A., Shishkova, S. & González, I.  
378 Lateral Root Initiation in Arabidopsis: Developmental Window, Spatial Patterning,  
379 Density and Predictability. *Annals of Botany* **97**, 903–915 (2006).
- 380 15. Horiguchi, G., Fujikura, U., Ferjani, A., Ishikawa, N. & Tsukaya, H. Large-scale histological  
381 analysis of leaf mutants using two simple leaf observation methods: identification of  
382 novel genetic pathways governing the size and shape of leaves. *The Plant Journal* **48**,  
383 638–644 (2006).
- 384 16. Pound, M. P., French, A. P., Wells, D. M., Bennett, M. J. & Pridmore, T. P. CellSeT: Novel  
385 Software to Extract and Analyze Structured Networks of Plant Cells from Confocal  
386 Images. *The Plant Cell* **24**, 1353–1361 (2012).
- 387 17. Arvidsson, S., Kwasniewski, M., Riaño-Pachón, D. M. & Mueller-Roeber, B. QuantPrime –  
388 a flexible tool for reliable high-throughput primer design for quantitative PCR. *BMC*  
389 *Bioinformatics* **9**, 465 (2008).
- 390 18. Turnbull, C. G. N., Booker, J. P. & Leyser, H. M. O. Micrografting techniques for testing  
391 long-distance signalling in Arabidopsis. *The Plant Journal* **32**, 255–262 (2002).

- 392 19. Kurihara, D., Mizuta, Y., Sato, Y. & Higashiyama, T. ClearSee: a rapid optical clearing  
393 reagent for whole-plant fluorescence imaging. *Development* **142**, 4168–4179 (2015).
- 394 20. Svačinová, J. *et al.* A new approach for cytokinin isolation from Arabidopsis tissues using  
395 miniaturized purification: pipette tip solid-phase extraction. *Plant Methods* **8**, 17 (2012).
- 396 21. Antoniadis, I. *et al.* Cell-Type-Specific Cytokinin Distribution within the Arabidopsis  
397 Primary Root Apex. *Plant Cell* **27**, 1955–1967 (2015).
- 398
- 399
